# Supplementary material for: Immune-Related Adverse Events, Biomarkers of Systemic Inflammation, and Survival Outcomes in Patients Receiving Pembrolizumab for Non-Small-Cell Lung Cancer
Source: MDPI journal article supplement (doi:10.3390/cancers15235502), 2023-11-21
Supplement: s1 [file s1]

|                         | Progression-Free Survival<br>(months) | Overall Survival<br>(months) |
|-------------------------|---------------------------------------|------------------------------|
|                         | Median<br>(IQR)                       | Median<br>(IQR)              |
| <b>Patients</b>         |                                       |                              |
| <b>Without irAE</b>     | 3.6 (1.3-13.1)                        | 7.8 (2.4-20.5)               |
| <b>With irAE</b>        | 16.8 (5.9-n/r)                        | 27.4 (13.9-n/r)              |
| <b>irAE Events</b>      |                                       |                              |
| <b>All</b>              | n/a                                   | n/a                          |
| <b>Dermatological</b>   | 19.6 (7.0-n/r)                        | 26.9 (12.6-n/r)              |
| <b>Endocrine</b>        | 17.1 (10.4-n/r)                       | 33.6 (19.7-n/r)              |
| <b>Gastrointestinal</b> | 45.4 (24.2-n/r)                       | n/r (22.3-n/r)               |
| <b>Hepatic</b>          | 11.5 (2.2-n/r)                        | n/r (12.0-n/r)               |
| <b>Musculoskeletal</b>  | 19.4 (6.4-26.5)                       | 19.9 (10.8-35.3)             |
| <b>Pulmonary</b>        | 3.9 (0.4-7.5)                         | 7.3 (0.7-10.7)               |

**Supplementary Table S1:** Progression-free survival and overall survival for patients with or without irAE and irAE events by the organ affected. n/r = not reached. n/a = not applicable

A

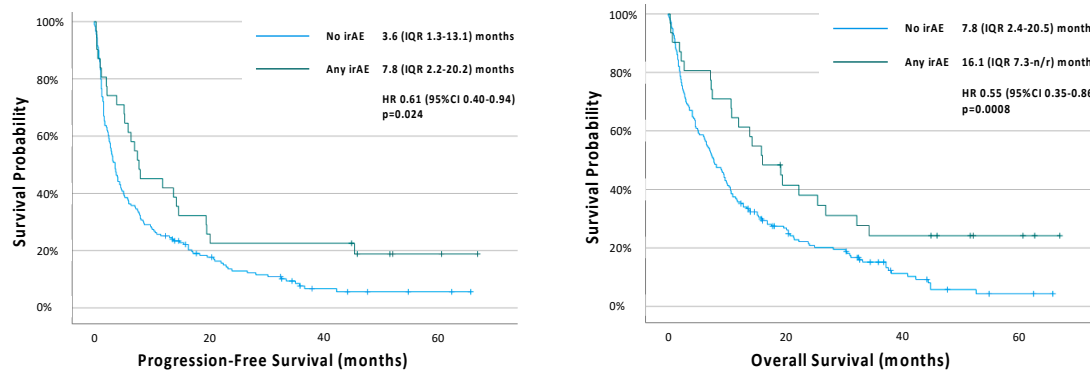

B

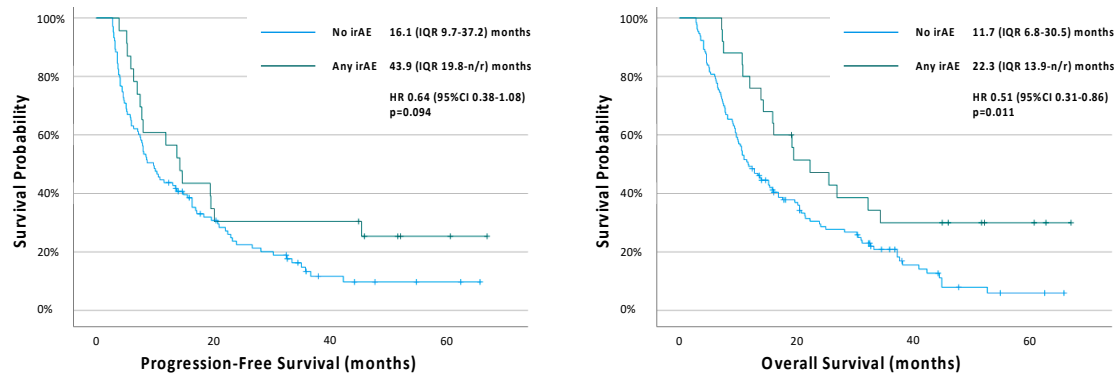

C

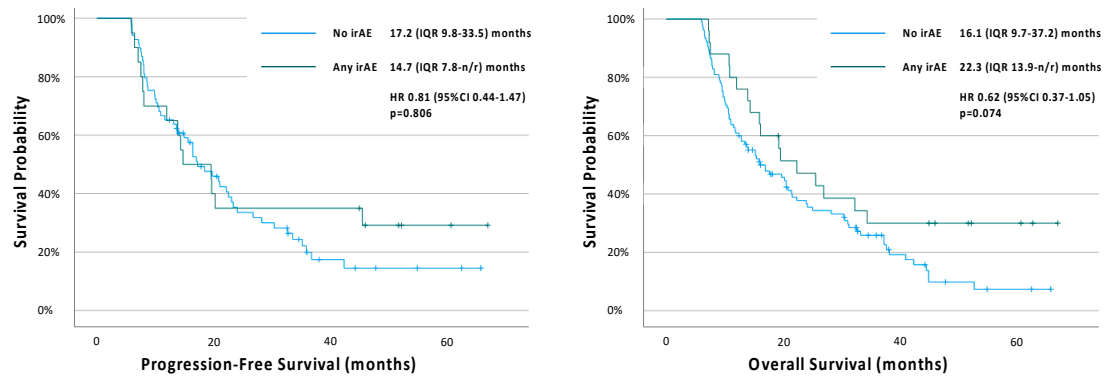

**Supplementary Figure S1:** Kaplan-Meier survival curves examining the relationship between the occurrence of severe (i.e. grade 3-5) immune-related adverse events and progression-free survival or overall survival in (A) all patients, (B) 12-week landmark and (C) 24-week landmark. n/r = not reached

A

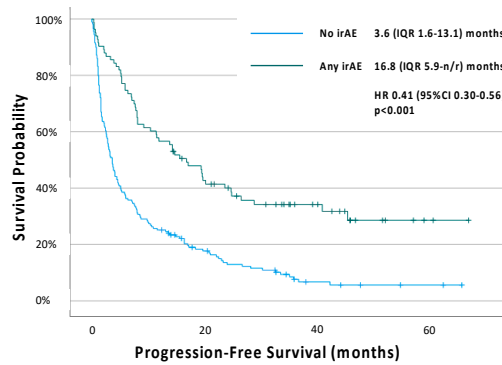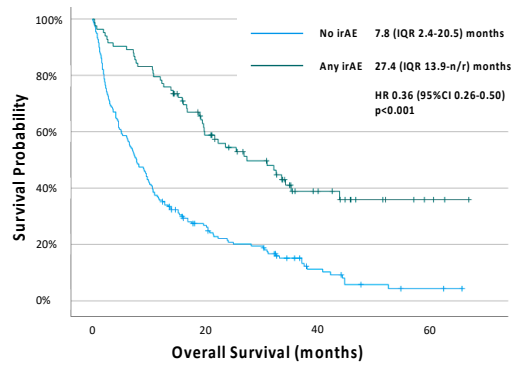

B

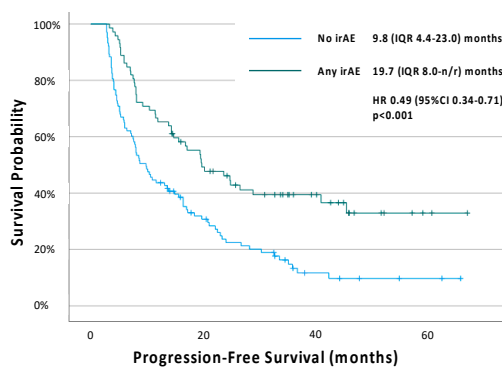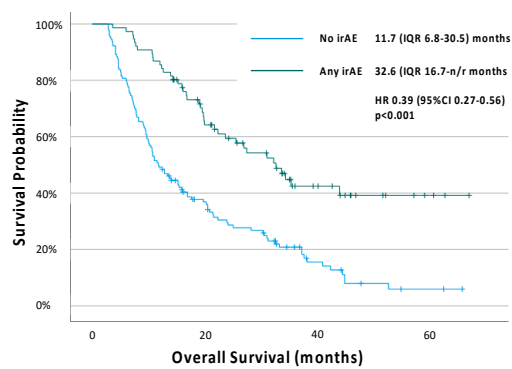

C

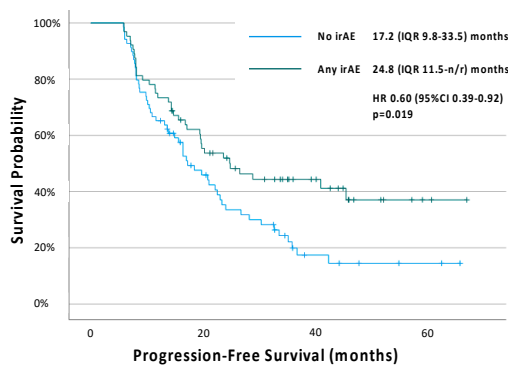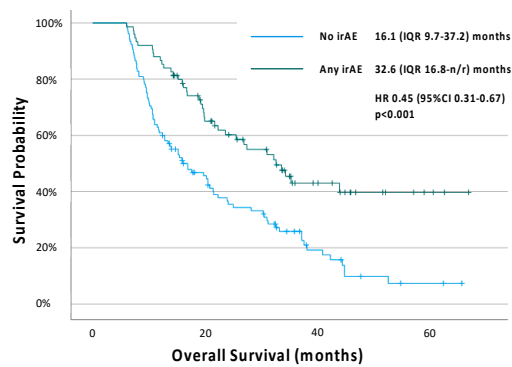

**Supplementary Figure S2:** Kaplan-Meier survival curves examining the relationship between the occurrence of mild (i.e. grade 1-2) immune-related adverse events and progression-free survival or overall survival in (A) all patients, (B) 12-week landmark and (C) 24-week landmark. n/r = not reached

A

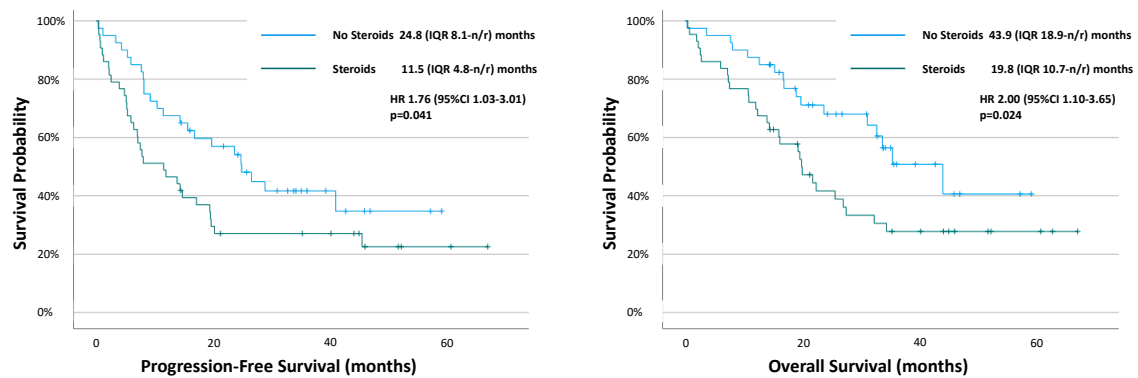

B

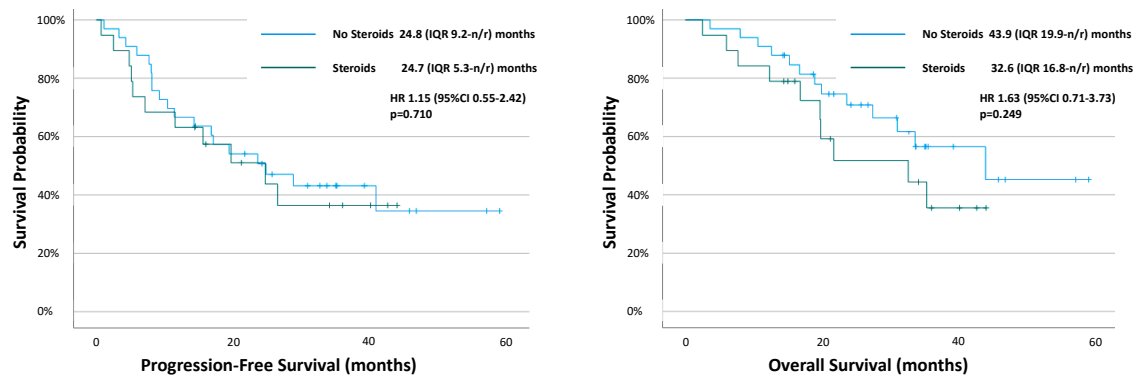

**Supplementary Figure S3:** Kaplan-Meier survival curves examining the relationship between steroid use and progression-free survival or overall survival in (A) all patients and (B) patients with mild (i.e. grade 1-2) immune-related adverse events. n/r = not reached

A

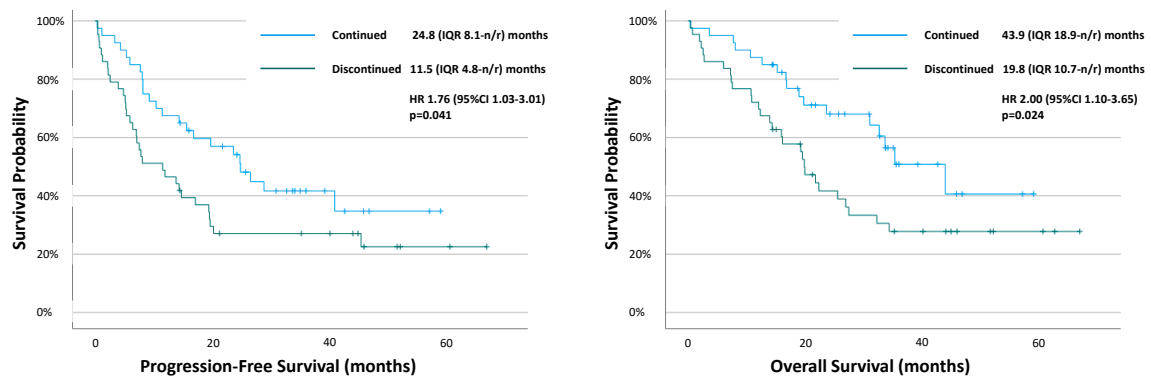

B

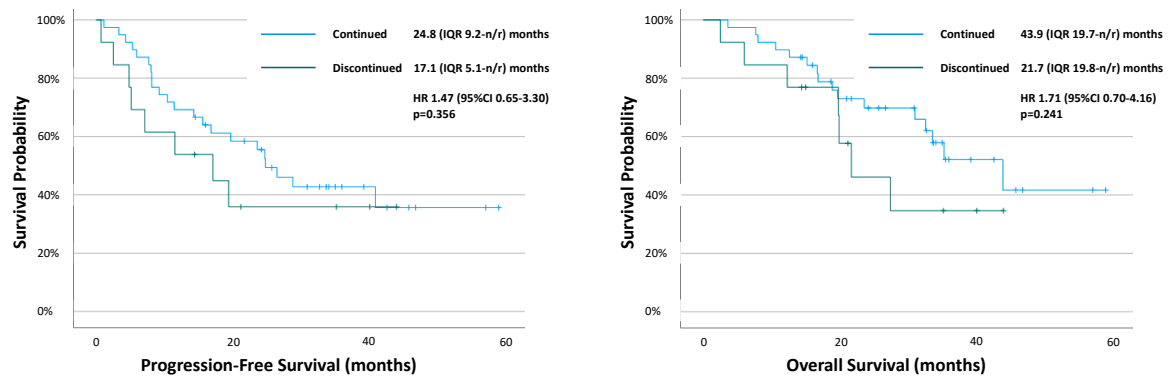

**Supplementary Figure S4:** Kaplan-Meier survival curves examining the relationship between treatment discontinuation and progression-free survival or overall survival in (A) all patients and (B) patients with mild (i.e. grade 1-2) immune-related adverse events. n/r = not reached

|                                                                | Progression-Free Survival |                  |                         |                  | Overall Survival        |                  |                         |                  |
|----------------------------------------------------------------|---------------------------|------------------|-------------------------|------------------|-------------------------|------------------|-------------------------|------------------|
|                                                                | Univariate                |                  | Multivariate            |                  | Univariate              |                  | Multivariate            |                  |
|                                                                | HR (95% CI)               | <i>p</i>         | HR (95% CI)             | <i>P</i>         | HR (95% CI)             | <i>p</i>         | HR (95% CI)             | <i>p</i>         |
| Age (<75 years, ≥75 years)                                     | 1.21 (0.85-1.73)          | <i>0.288</i>     |                         |                  | 1.16 (0.79-1.70)        | <i>0.447</i>     |                         |                  |
| Sex (Male, Female)                                             | 1.08 (0.83-1.41)          | <i>0.574</i>     |                         |                  | 0.99 (0.75-1.30)        | <i>0.924</i>     |                         |                  |
| Performance Status (0, 1, 2)                                   | <b>1.55 (1.20-2.00)</b>   | <b>0.01</b>      | <b>1.40 (1.07-1.83)</b> | <b>0.012</b>     | <b>1.64 (1.25-2.26)</b> | <b>&lt;0.001</b> | <b>1.49 (1.12-1.98)</b> | <b>0.006</b>     |
| Histological Subtype (Squamous, non-squamous)                  | 1.06 (0.76-1.47)          | <i>0.751</i>     |                         |                  | 1.07 (0.76-1.49)        | <i>0.712</i>     |                         |                  |
| PD-L1 Status (<90%, ≥90%)                                      | <b>0.76 (0.58-1.00)</b>   | <b>0.048</b>     | <b>0.71 (0.54-0.93)</b> | <b>0.012</b>     | 0.76 (0.58-1.01)        | <i>0.055</i>     |                         |                  |
| WCC (≤11x10 <sup>9</sup> /L, >11x10 <sup>9</sup> /L)           | <b>1.54 (1.17-2.03)</b>   | <b>0.002</b>     |                         |                  | <b>1.67 (1.26-2.23)</b> | <b>&lt;0.001</b> |                         |                  |
| Neutrophils (≤7.5x10 <sup>9</sup> /L, >7.5x10 <sup>9</sup> /L) | <b>1.76 (1.34-2.32)</b>   | <b>&lt;0.001</b> |                         |                  | <b>1.88 (1.42-2.49)</b> | <b>&lt;0.001</b> |                         |                  |
| Neutrophil/Lymphocyte Ratio (≤5, >5)                           | <b>1.68 (1.29-2.20)</b>   | <b>&lt;0.001</b> |                         |                  | <b>1.85 (1.40-2.44)</b> | <b>&lt;0.001</b> |                         |                  |
| Platelet/Neutrophil Ratio (≤180, >180)                         | 1.27 (0.95-1.70)          | <i>0.108</i>     |                         |                  | <b>1.39 (1.02-1.88)</b> | <b>0.036</b>     |                         |                  |
| Albumin (<35g/L, ≥35g/L)                                       | <b>1.93 (1.48-2.53)</b>   | <b>&lt;0.001</b> |                         |                  | <b>2.12 (1.60-2.80)</b> | <b>&lt;0.001</b> |                         |                  |
| Prognostic Nutritional Index (<45, ≥45)                        | <b>0.63 (0.48-0.83)</b>   | <b>0.001</b>     |                         |                  | <b>0.57 (0.43-0.76)</b> | <b>&lt;0.001</b> |                         |                  |
| Scottish Inflammatory Prognostic Score (0, 1, 2)               | <b>1.66 (1.39-1.97)</b>   | <b>&lt;0.001</b> | <b>1.64 (1.38-1.96)</b> | <b>&lt;0.001</b> | <b>1.75 (1.47-2.09)</b> | <b>&lt;0.001</b> | <b>1.69 (1.41-2.02)</b> | <b>&lt;0.001</b> |

**Supplementary Table S2:** The relationship between prognostic factors and progression-free or overall survival in all patients. Bold/italics represent statistically significant findings (p<0.05)

A

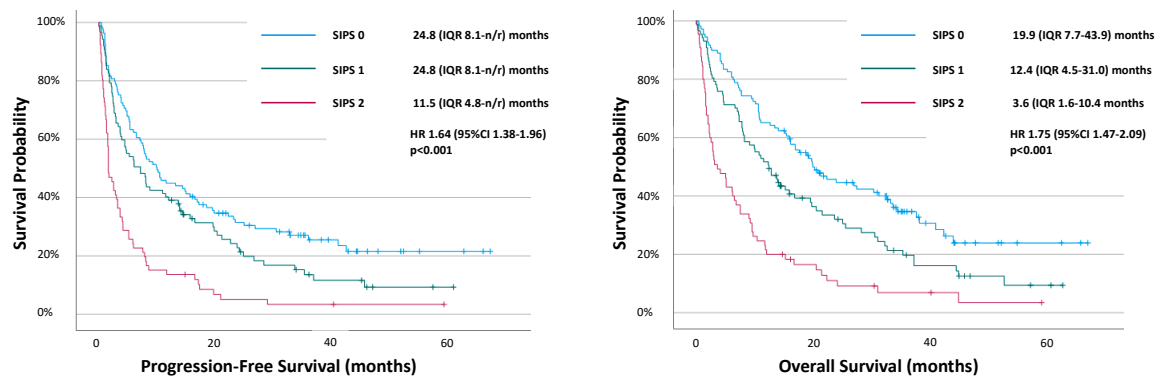

B

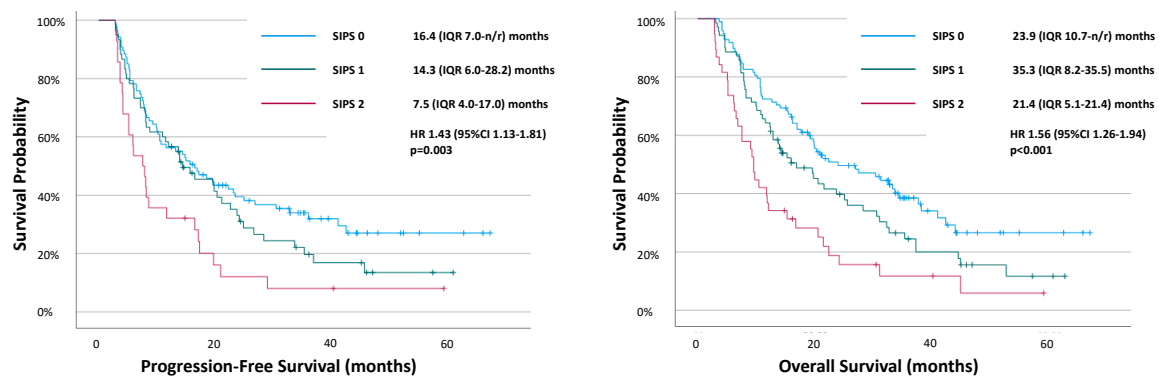

C

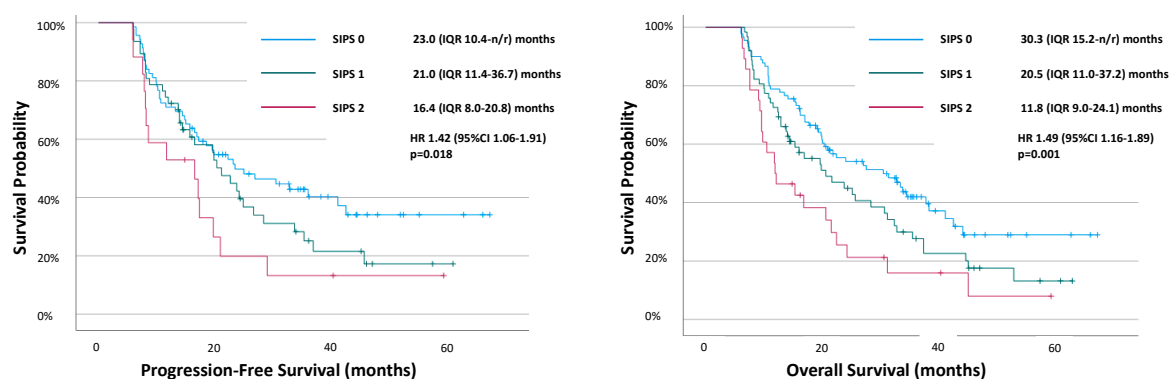

**Supplementary Figure S5:** Kaplan-Meier survival curves examining the relationship between the Scottish Inflammatory Prognostic Score (SIPS) and progression-free survival or overall survival in (A) all patients, (B) 12-week landmark and (C) 24-week landmark. n/r = not reached

A

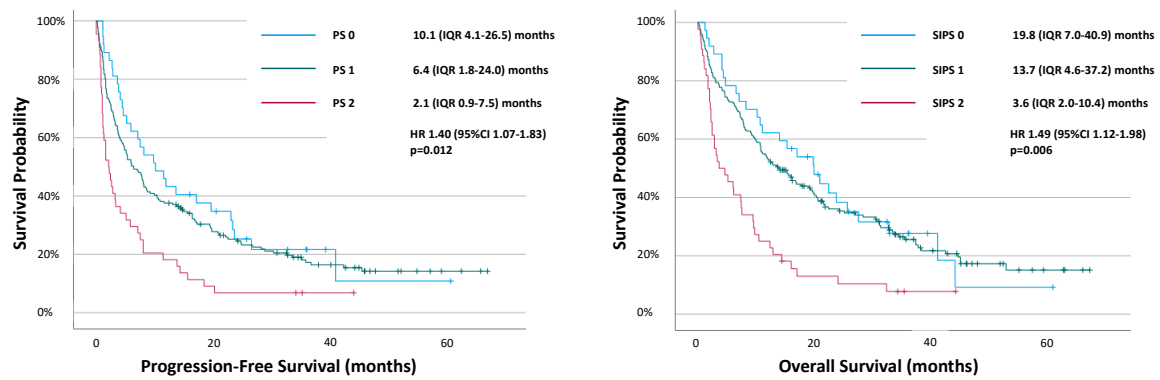

**Supplementary Figure S6:** Kaplan-Meier survival curves examining the relationship between performance status (PS) and progression-free survival or overall survival in all patients



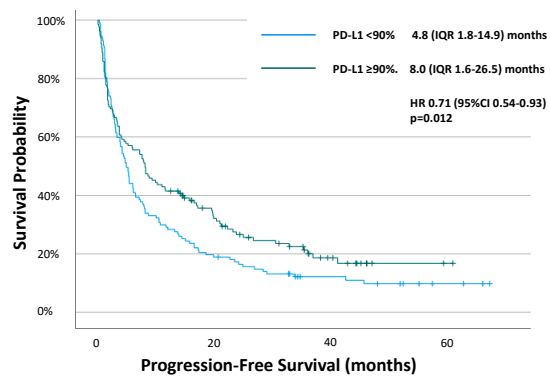

**Supplementary Figure S7:** Kaplan-Meier survival curves examining the relationship between PD-L1 status and progression-free survival
